# Supplementary material
Source: Springer Nature journal article supplement (https://www.springermedizin.de/resource/supplementary/13601_2012_291_MOESM2_ESM.pdf/9677822)

# The Airway in Asthma

## Remodeling

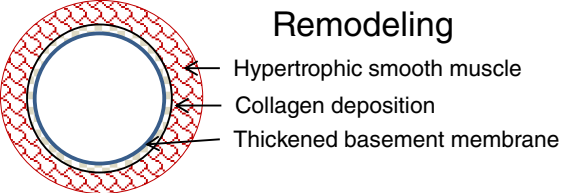

## Inflammation & Bronchial Hyperresponsiveness

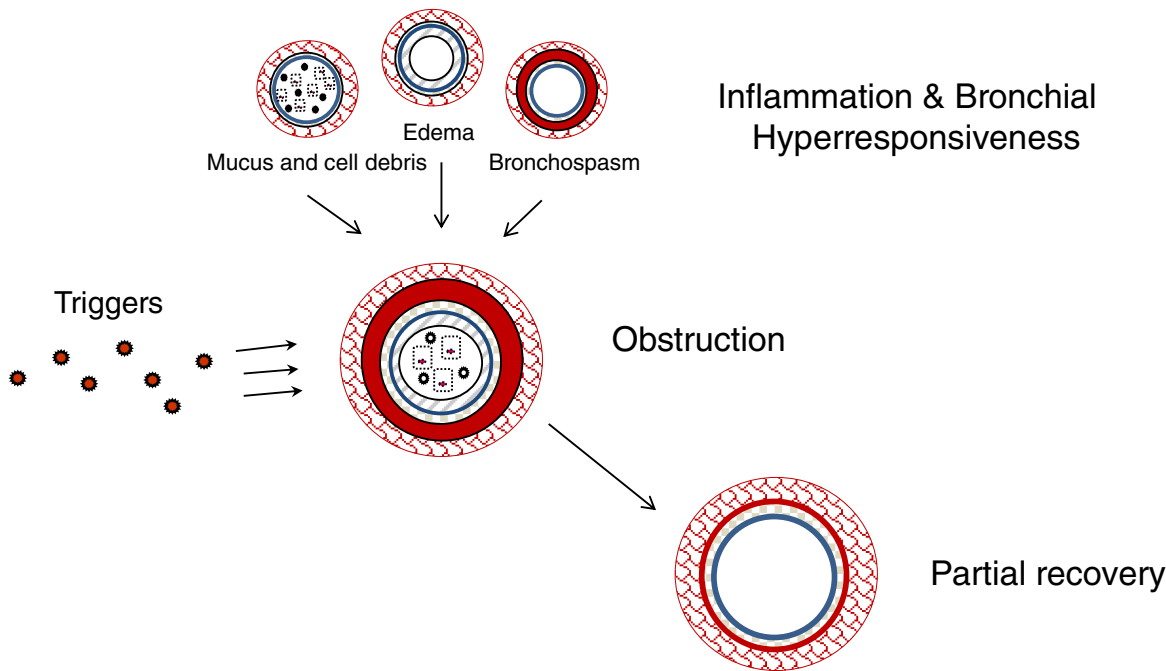

Supplement: MOESM2 [file 9677822]
